# Supplementary material for: Wheel-like Gd42 polynuclear complexes with significant magnetocaloric effect
Source: Royal Society of Chemistry journal article supplement (doi:10.1039/d2ce00315e), 2022-01-01
Supplement: d2ce00315e1.pdf [file d2ce00315e1.pdf]

**Supporting Information**

**Wheel-like Gd<sub>42</sub> Polynuclear Complex with Significant Magnetocaloric Effect**

Zi-Wei Che<sup>a</sup>, Ji-Tun Chen,<sup>a</sup> Tian-Tian Wang,<sup>a</sup> Han Yan,<sup>a</sup> Teng-Da Zhou,<sup>a</sup> Rui Guo,<sup>a</sup> Wen-Bin Sun<sup>\*a</sup>

Key Laboratory of Functional Inorganic Material Chemistry Ministry of Education, School of Chemistry and Material Science Heilongjiang University, 74 Xuefu Road, Harbin 150080, P. R. China.

E-mail: wenbinsun@126.com

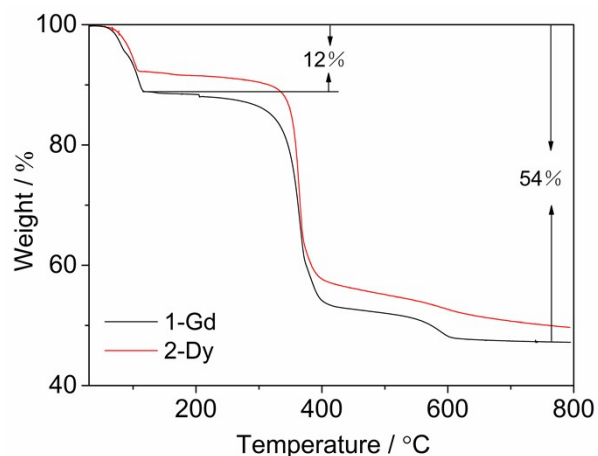

**Fig. S1.** The thermogravimetric analysis of **1-Gd** and **2-Dy**.

TGA analyses of **1-Gd** and **2-Dy** obtained similar results. For the complex **2-Dy**, at 100 °C, about 10 % weight loss is caused by the escape of uncoordinated solvent molecules (such as H<sub>2</sub>O, MeOH) in the pores. As the temperature increases, the cluster compounds begin to decompose around 300 °C and heat to 600 °C, the weight is almost unchanged, and the remaining 48 % is Dy<sub>2</sub>O<sub>3</sub>, which is basically in line with the theoretical calculation.

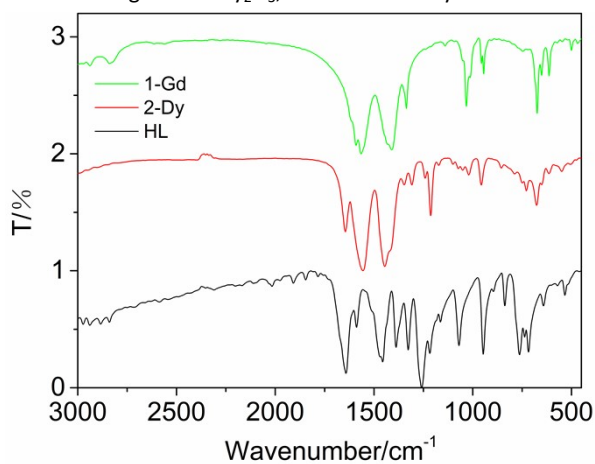

**Fig. S2.** IR spectra of free ligand H<sub>2</sub>L and complexes.

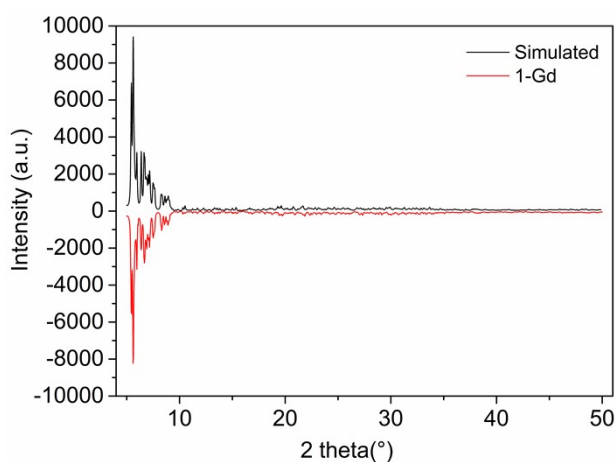

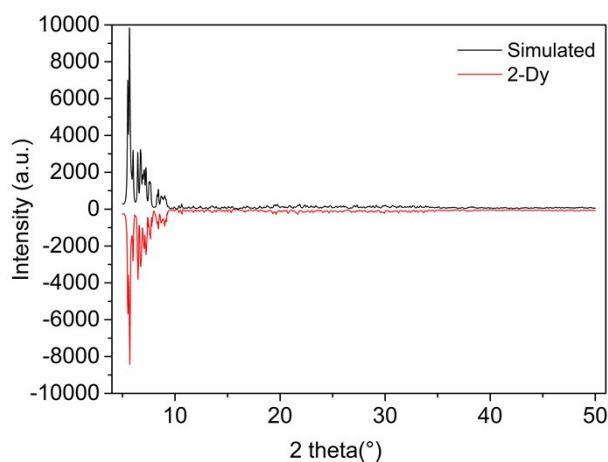

**Fig. S3.** PXRD curve for complexes **1-Gd**(top) and **2-Dy**(bottom).

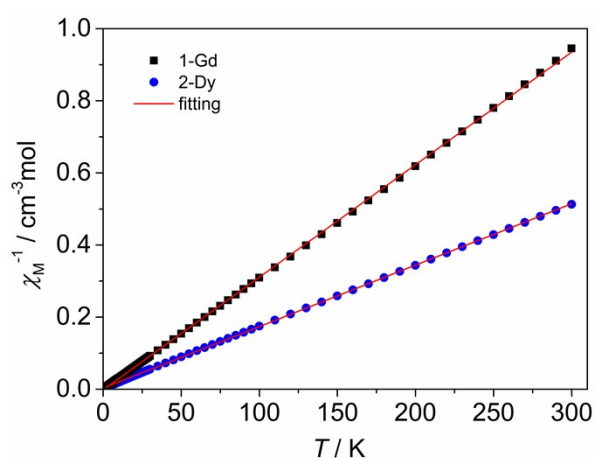

**Fig. S4.** The  $\chi_M^{-1}$  vs  $T$  and the Curie-Weiss linear fit for **1-Gd** and **2-Dy**.

The direct current (dc) magnetic properties of the complexes were investigated under 1000 Oe field in the temperature range of 2-300 K and fitted with the Curie-Weiss law. For **1-Gd**, Curie constant  $C = 320.27 \text{ cm}^3 \text{ K mol}^{-1}$  and Weiss constant  $\theta = +0.54 \text{ K}$ . Positive  $\theta$  indicates that ferromagnetic interaction between  $\text{Gd}^{3+}$  ions and vice versa. For **2-Dy**, the Curie constant  $C = 586.44 \text{ cm}^3 \text{ K mol}^{-1}$  and Weiss constant  $\theta = -1.76 \text{ K}$  by fitting the temperature dependence of magnetic susceptibilities.

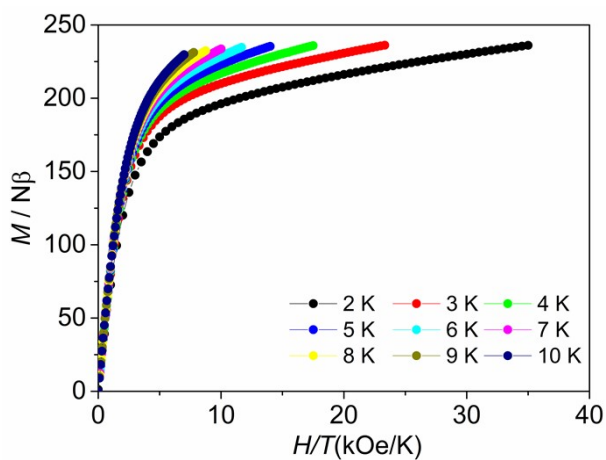

**Fig. S5.** Magnetization versus  $H/T$  for **2-Dy** at 2-10 K and 0-7 T dc magnetic field.

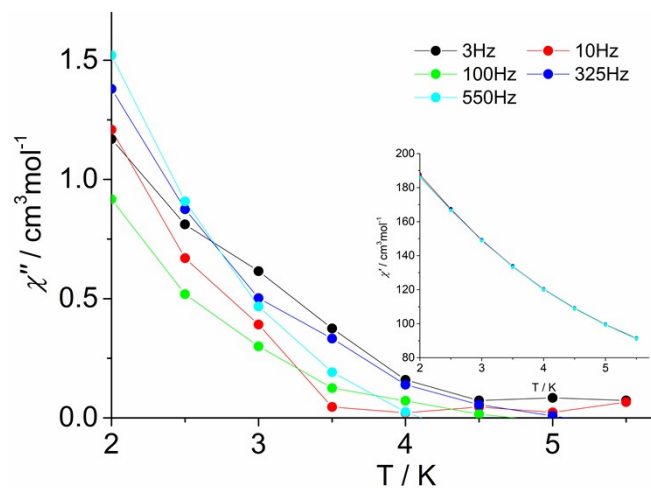

**Fig. S6.** Temperature dependence of the in-phase (inset) and out-of-phase ac susceptibility at the indicated frequencies with  $\Delta H = 1500$  Oe for **2-Dy**.

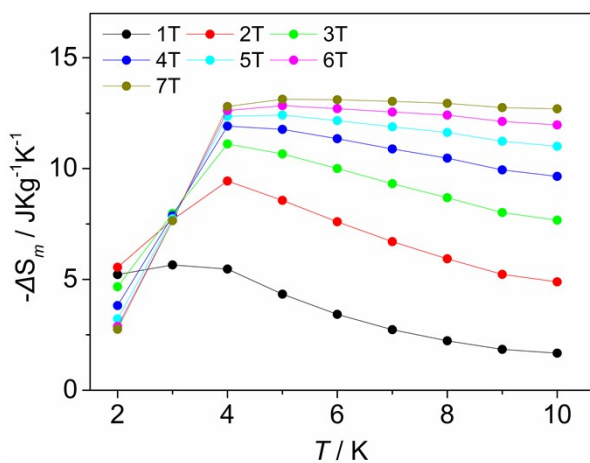

**Fig. S7.**  $-\Delta S_m$  calculated by using the magnetization data of **2-Dy** at different fields and temperatures.

**Table S1.** Selected bond lengths (Å) for **1-Gd**.

|          |            |                       |            |
|----------|------------|-----------------------|------------|
| Gd1-O2   | 2.345(2)   | Gd11-O44              | 2.454(2)   |
| Gd1-O10  | 2.348(2)   | Gd11-O49              | 2.469(2)   |
| Gd1-O9   | 2.3647(17) | Gd11-O93              | 2.472(3)   |
| Gd1-O37  | 2.375(2)   | Gd11-O84              | 2.473(2)   |
| Gd1-O20  | 2.4218(17) | Gd11-O100             | 2.480(2)   |
| Gd1-O11  | 2.4340(19) | Gd11-O62              | 2.565(2)   |
| Gd1-O15  | 2.512(2)   | Gd12-O22              | 2.3306(18) |
| Gd1-Gd2  | 3.8920(3)  | Gd12-O16              | 2.340(2)   |
| Gd1-Gd9  | 3.9190(3)  | Gd12-O1               | 2.342(2)   |
| Gd2-O39  | 2.3484(18) | Gd12-O36              | 2.349(2)   |
| Gd2-O10  | 2.373(2)   | Gd12-O110             | 2.3670(18) |
| Gd2-O97  | 2.432(2)   | Gd12-O50              | 2.403(2)   |
| Gd2-O32  | 2.461(2)   | Gd12-O96 <sup>1</sup> | 2.4417(19) |
| Gd2-O2   | 2.465(2)   | Gd12-O80              | 2.514(3)   |
| Gd2-O87  | 2.478(3)   | Gd13-O25              | 2.351(2)   |
| Gd2-O98  | 2.483(2)   | Gd13-O23 <sup>1</sup> | 2.3725(19) |
| Gd2-O63  | 2.485(3)   | Gd13-O96              | 2.422(2)   |
| Gd2-O33  | 2.5150(17) | Gd13-O40 <sup>1</sup> | 2.457(2)   |
| Gd3-O12  | 2.321(2)   | Gd13-O95 <sup>1</sup> | 2.474(2)   |
| Gd3-O5   | 2.348(2)   | Gd13-O65 <sup>1</sup> | 2.480(2)   |
| Gd3-O7   | 2.350(2)   | Gd13-O36 <sup>1</sup> | 2.4810(19) |
| Gd3-O27  | 2.356(2)   | Gd13-O70              | 2.481(2)   |
| Gd3-O102 | 2.362(2)   | Gd13-O34              | 2.515(2)   |
| Gd3-O103 | 2.4156(17) | Gd14-O26              | 2.303(2)   |
| Gd3-O14  | 2.4441(16) | Gd14-O67              | 2.363(2)   |
| Gd3-O111 | 2.507(2)   | Gd14-O24              | 2.367(2)   |
| Gd4-O113 | 2.394(2)   | Gd14-O3               | 2.373(2)   |
| Gd4-O7   | 2.4131(15) | Gd14-O28              | 2.382(2)   |
| Gd4-O11  | 2.418(2)   | Gd14-O38              | 2.4329(19) |
| Gd4-O18  | 2.425(2)   | Gd14-O101             | 2.4407(18) |
| Gd4-O103 | 2.427(2)   | Gd14-O115             | 2.534(3)   |
| Gd4-O99  | 2.433(2)   | Gd15-O45              | 2.397(2)   |
| Gd4-O107 | 2.449(2)   | Gd15-O23              | 2.407(2)   |
| Gd4-O21  | 2.495(2)   | Gd15-O60              | 2.420(2)   |
| Gd4-O37  | 2.508(2)   | Gd15-O96 <sup>1</sup> | 2.4233(17) |
| Gd5-O94  | 2.318(2)   | Gd15-O68              | 2.447(2)   |
| Gd5-O100 | 2.3565(19) | Gd15-O34 <sup>1</sup> | 2.449(2)   |
| Gd5-O98  | 2.359(2)   | Gd15-O6               | 2.456(2)   |
| Gd5-O112 | 2.365(2)   | Gd15-O61              | 2.487(2)   |
| Gd5-O109 | 2.3662(19) | Gd15-O110             | 2.529(2)   |
| Gd5-O19  | 2.4206(19) | Gd16-O35              | 2.333(2)   |
| Gd5-O97  | 2.4498(19) | Gd16-O17              | 2.362(2)   |
| Gd5-O55  | 2.515(2)   | Gd16-O49              | 2.367(2)   |

---

|           |            |                        |            |
|-----------|------------|------------------------|------------|
| Gd6-O47   | 2.351(2)   | Gd16-O52               | 2.3670(18) |
| Gd6-O16   | 2.371(2)   | Gd16-O8                | 2.367(2)   |
| Gd6-O101  | 2.433(2)   | Gd16-O57               | 2.425(2)   |
| Gd6-O43   | 2.452(2)   | Gd16-O13               | 2.429(2)   |
| Gd6-O72   | 2.470(2)   | Gd16-O118              | 2.505(3)   |
| Gd6-O1    | 2.472(2)   | Gd17-O46               | 2.315(2)   |
| Gd6-O28   | 2.4736(19) | Gd17-O95               | 2.3518(19) |
| Gd6-O69   | 2.478(3)   | Gd17-O23               | 2.360(2)   |
| Gd6-O58   | 2.532(2)   | Gd17-O29               | 2.380(2)   |
| Gd7-O30   | 2.3384(18) | Gd17-O106              | 2.3810(17) |
| Gd7-O7    | 2.368(2)   | Gd17-O6                | 2.401(2)   |
| Gd7-O11   | 2.4273(17) | Gd17-O105 <sup>1</sup> | 2.451(2)   |
| Gd7-O53   | 2.458(2)   | Gd17-O76               | 2.519(3)   |
| Gd7-O5    | 2.462(2)   | Gd18-O119              | 2.385(2)   |
| Gd7-O85   | 2.477(3)   | Gd18-O24               | 2.3952(18) |
| Gd7-O116  | 2.478(3)   | Gd18-O14               | 2.412(2)   |
| Gd7-O9    | 2.484(2)   | Gd18-O51               | 2.413(2)   |
| Gd7-O99   | 2.5097(19) | Gd18-O89               | 2.428(2)   |
| Gd8-O24   | 2.353(2)   | Gd18-O38               | 2.430(2)   |
| Gd8-O48   | 2.3561(18) | Gd18-O73               | 2.449(2)   |
| Gd8-O14   | 2.4392(19) | Gd18-O83               | 2.480(3)   |
| Gd8-O31   | 2.453(3)   | Gd18-O27               | 2.5445(18) |
| Gd8-O3    | 2.461(2)   | Gd19-O104              | 2.343(2)   |
| Gd8-O82   | 2.472(3)   | Gd19-O17               | 2.364(2)   |
| Gd8-O77   | 2.488(3)   | Gd19-O105              | 2.445(2)   |
| Gd8-O102  | 2.4941(17) | Gd19-O8                | 2.472(2)   |
| Gd8-O51   | 2.514(2)   | Gd19-O29 <sup>1</sup>  | 2.472(2)   |
| Gd9-O54   | 2.385(2)   | Gd19-O56               | 2.4730(19) |
| Gd9-O97   | 2.3946(18) | Gd19-O79 <sup>1</sup>  | 2.478(3)   |
| Gd9-O10   | 2.4090(17) | Gd19-O86               | 2.488(2)   |
| Gd9-O59   | 2.409(3)   | Gd19-O114              | 2.537(2)   |
| Gd9-O33   | 2.428(2)   | Gd20-O75               | 2.387(2)   |
| Gd9-O20   | 2.433(2)   | Gd20-O81               | 2.405(2)   |
| Gd9-O64   | 2.4717(19) | Gd20-O101              | 2.4074(19) |
| Gd9-O117  | 2.473(2)   | Gd20-O16               | 2.419(2)   |
| Gd9-O109  | 2.533(2)   | Gd20-O58               | 2.428(3)   |
| Gd10-O92  | 2.396(3)   | Gd20-O91               | 2.441(3)   |
| Gd10-O13  | 2.3979(16) | Gd20-O74               | 2.459(3)   |
| Gd10-O19  | 2.400(2)   | Gd20-O67               | 2.537(2)   |
| Gd10-O62  | 2.420(3)   | Gd21-O42               | 2.394(3)   |
| Gd10-O112 | 2.4226(19) | Gd21-O105              | 2.4005(16) |
| Gd10-O71  | 2.431(3)   | Gd21-O57               | 2.404(3)   |
| Gd10-O78  | 2.461(2)   | Gd21-O17               | 2.412(2)   |
| Gd10-O90  | 2.471(3)   | Gd21-O88               | 2.429(2)   |

---

|           |          |                        |          |
|-----------|----------|------------------------|----------|
| Gd10-O52  | 2.534(2) | Gd21-O114              | 2.438(3) |
| Gd11-O108 | 2.346(2) | Gd21-O66 <sup>1</sup>  | 2.471(2) |
| Gd11-O112 | 2.359(2) | Gd21-O41               | 2.473(3) |
| Gd11-O13  | 2.438(2) | Gd21-O106 <sup>1</sup> | 2.553(2) |

**Table S2.** Selected bond lengths (Å) for **2-Dy**.

|           |          |                        |          |
|-----------|----------|------------------------|----------|
| Dy01-O025 | 2.320(6) | Dy0B-O00M              | 2.446(6) |
| Dy01-O00U | 2.332(5) | Dy0B-O027              | 2.457(6) |
| Dy01-O00Q | 2.402(5) | Dy0B-O02R              | 2.534(6) |
| Dy01-O01R | 2.428(6) | Dy0C-O02C              | 2.363(6) |
| Dy01-O02X | 2.434(6) | Dy0C-O011              | 2.380(5) |
| Dy01-O00S | 2.443(5) | Dy0C-O01M              | 2.384(5) |
| Dy01-O00W | 2.457(5) | Dy0C-O01O              | 2.396(6) |
| Dy01-O031 | 2.463(6) | Dy0C-O01K              | 2.402(5) |
| Dy01-O022 | 2.493(5) | Dy0C-O023              | 2.405(6) |
| Dy02-O016 | 2.292(6) | Dy0C-O02P              | 2.413(6) |
| Dy02-O00U | 2.324(5) | Dy0C-O02S              | 2.458(6) |
| Dy02-O020 | 2.332(5) | Dy0C-O020              | 2.490(6) |
| Dy02-O00S | 2.332(5) | Dy0D-O00R              | 2.300(6) |
| Dy02-O00N | 2.345(5) | Dy0D-O00O              | 2.320(6) |
| Dy02-O01B | 2.391(6) | Dy0D-O01V              | 2.325(6) |
| Dy02-O01M | 2.416(5) | Dy0D-O00T              | 2.334(5) |
| Dy02-O01F | 2.485(6) | Dy0D-O027              | 2.350(5) |
| Dy03-O02D | 2.369(6) | Dy0D-O02I              | 2.397(5) |
| Dy03-O00Z | 2.381(5) | Dy0D-O010              | 2.417(5) |
| Dy03-O02G | 2.389(6) | Dy0D-O02U              | 2.479(6) |
| Dy03-O01A | 2.390(5) | Dy0E-O01X              | 2.283(6) |
| Dy03-O01D | 2.403(6) | Dy0E-O03G              | 2.334(6) |
| Dy03-O00V | 2.405(6) | Dy0E-O029              | 2.342(6) |
| Dy03-O038 | 2.424(6) | Dy0E-O01N              | 2.338(6) |
| Dy03-O01U | 2.464(6) | Dy0E-O012              | 2.355(5) |
| Dy03-O017 | 2.497(5) | Dy0E-O036              | 2.409(6) |
| Dy04-O019 | 2.304(6) | Dy0E-O018 <sup>1</sup> | 2.412(5) |
| Dy04-O01C | 2.342(6) | Dy0E-O03K              | 2.517(6) |
| Dy04-O015 | 2.343(5) | Dy0F-O01T <sup>1</sup> | 2.330(6) |
| Dy04-O00Z | 2.337(5) | Dy0F-O01N              | 2.326(5) |
| Dy04-O024 | 2.363(6) | Dy0F-O01I              | 2.419(5) |
| Dy04-O00V | 2.373(5) | Dy0F-O01W              | 2.427(6) |
| Dy04-O01L | 2.426(5) | Dy0F-O03I              | 2.438(6) |
| Dy04-O03A | 2.488(5) | Dy0F-O012              | 2.446(5) |
| Dy05-O01H | 2.303(5) | Dy0F-O03T              | 2.456(7) |
| Dy05-O00X | 2.334(6) | Dy0F-O021              | 2.464(5) |
| Dy05-O011 | 2.327(5) | Dy0F-O02M              | 2.488(6) |
| Dy05-O021 | 2.340(6) | Dy0G-O010              | 2.360(5) |

---

|           |          |                        |          |
|-----------|----------|------------------------|----------|
| Dy05-O02Z | 2.352(6) | Dy0G-O035              | 2.372(6) |
| Dy05-O01O | 2.389(5) | Dy0G-O01J              | 2.378(6) |
| Dy05-O01I | 2.426(5) | Dy0G-O02R              | 2.392(6) |
| Dy05-O02J | 2.488(6) | Dy0G-O01E              | 2.398(5) |
| Dy06-O00P | 2.289(5) | Dy0G-O039              | 2.410(6) |
| Dy06-O00M | 2.332(6) | Dy0G-O03W              | 2.433(6) |
| Dy06-O01E | 2.329(5) | Dy0G-O03D              | 2.440(6) |
| Dy06-O00W | 2.337(6) | Dy0G-O01V              | 2.515(6) |
| Dy06-O026 | 2.346(5) | Dy0H-O01G              | 2.322(5) |
| Dy06-O01J | 2.401(5) | Dy0H-O014              | 2.324(5) |
| Dy06-O00Q | 2.435(5) | Dy0H-O018              | 2.411(5) |
| Dy06-O02W | 2.494(6) | Dy0H-O02A              | 2.424(5) |
| Dy07-O01P | 2.316(6) | Dy0H-O029 <sup>1</sup> | 2.438(6) |
| Dy07-O00Z | 2.341(5) | Dy0H-O03L <sup>1</sup> | 2.438(7) |
| Dy07-O01A | 2.399(5) | Dy0H-O01Q              | 2.446(5) |
| Dy07-O02F | 2.422(6) | Dy0H-O03J              | 2.453(6) |
| Dy07-O037 | 2.436(6) | Dy0H-O034              | 2.509(5) |
| Dy07-O015 | 2.438(6) | Dy0I-O028              | 2.305(6) |
| Dy07-O02L | 2.459(6) | Dy0I-O011              | 2.349(5) |
| Dy07-O00Y | 2.462(6) | Dy0I-O01M              | 2.396(5) |
| Dy07-O01D | 2.485(5) | Dy0I-O00X              | 2.436(5) |
| Dy08-O02Y | 2.365(7) | Dy0I-O02K              | 2.438(6) |
| Dy08-O00Q | 2.361(5) | Dy0I-O03R              | 2.448(6) |
| Dy08-O02H | 2.385(6) | Dy0I-O00N              | 2.448(5) |
| Dy08-O01B | 2.396(6) | Dy0I-O03N              | 2.449(7) |
| Dy08-O022 | 2.396(6) | Dy0I-O023              | 2.481(6) |
| Dy08-O00U | 2.395(5) | Dy0J-O01S              | 2.358(6) |
| Dy08-O02V | 2.447(6) | Dy0J-O01L              | 2.357(5) |
| Dy08-O02Q | 2.448(6) | Dy0J-O00T              | 2.386(5) |
| Dy08-O026 | 2.526(5) | Dy0J-O032              | 2.394(6) |
| Dy09-O02B | 2.320(5) | Dy0J-O02I              | 2.398(6) |
| Dy09-O00T | 2.330(5) | Dy0J-O03S              | 2.404(7) |
| Dy09-O01L | 2.425(5) | Dy0J-O03X              | 2.435(7) |
| Dy09-O01Y | 2.435(6) | Dy0J-O02N              | 2.438(5) |
| Dy09-O02T | 2.435(6) | Dy0J-O024              | 2.537(5) |
| Dy09-O01C | 2.456(5) | Dy0K-O03B              | 2.369(7) |
| Dy09-O00O | 2.461(5) | Dy0K-O01I              | 2.372(5) |
| Dy09-O03C | 2.462(6) | Dy0K-O01N              | 2.382(5) |
| Dy09-O032 | 2.499(5) | Dy0K-O036              | 2.414(7) |
| Dy0A-O013 | 2.312(5) | Dy0K-O03P              | 2.414(6) |
| Dy0A-O01Q | 2.320(5) | Dy0K-O02M              | 2.413(6) |
| Dy0A-O014 | 2.324(5) | Dy0K-O030              | 2.419(6) |
| Dy0A-O00Y | 2.330(6) | Dy0K-O03Q              | 2.460(6) |
| Dy0A-O017 | 2.343(5) | Dy0K-O02Z              | 2.512(6) |

---



---

|           |          |                        |          |
|-----------|----------|------------------------|----------|
| Dy0A-O02E | 2.384(6) | Dy0L-O018              | 2.372(5) |
| Dy0A-O01A | 2.414(5) | Dy0L-O03F              | 2.377(7) |
| Dy0A-O033 | 2.486(6) | Dy0L-O03M              | 2.383(7) |
| Dy0B-O02O | 2.307(5) | Dy0L-O02E              | 2.389(6) |
| Dy0B-O01E | 2.321(5) | Dy0L-O014              | 2.400(5) |
| Dy0B-O010 | 2.410(5) | Dy0L-O034              | 2.404(7) |
| Dy0B-O03O | 2.431(6) | Dy0L-O03U              | 2.412(7) |
| Dy0B-O01Z | 2.432(6) | Dy0L-O03H <sup>1</sup> | 2.434(6) |
| Dy0B-O03E | 2.445(6) | Dy0L-O03G <sup>1</sup> | 2.514(6) |

---
